# Supplementary material for: Revisiting the Maitland–Japp reaction. Concise construction of highly functionalised tetrahydropyran-4-ones
Source: Royal Society of Chemistry journal article supplement (doi:10.1039/b416247a), 2005-01-01

# Supporting Information

## Revisiting the Maitland-Japp Reaction: One Pot, Multi-Component Construction of Highly Substituted Tetrahydropyan-4-ones.

*Paul A. Clarke,\* William H. C. Martin, Jason M. Hargreaves, Claire Wilson and Alexander J. Blake*

1. General procedure for the  $\text{TiCl}_4$  promoted Maitland-Japp reaction.
2. General procedure for the  $\text{Yb}(\text{OTf})_3$  promoted Maitland-Japp reaction.
3. Representative characterisation data, **5b**, **6b**, **5c**, **6c**, **8i** and **9b**.
4. Determination of the enantiomeric excess **8i** and **9b**.
5. X-ray data. CIF files of **5b** and **6b**.
6. Chiral shift  $^1\text{H}$  NMR of **8i** and **9b**.

### General procedure for the $\text{TiCl}_4$ promoted Maitland-Japp reaction

To a solution of aldehyde (1.00 mmol) in  $\text{CH}_2\text{Cl}_2$  (10 mL) at  $-78\text{ }^\circ\text{C}$  was added titanium tetrachloride (111  $\mu\text{L}$ , 1.00 mmol). The black solution was stirred for 2 min and then Chan's diene (570  $\mu\text{L}$ , 2.00 mmol) was added over a 1 min period. The black solution was stirred at  $-78\text{ }^\circ\text{C}$  for 1 h and then trifluoroacetic acid (308  $\mu\text{L}$  4 mmol) was added. After 2 min the second aldehyde (1.20 mmol) was added and the solution was allowed to warm to room temperature over a 5 min period. The black solution was stirred at room temperature for 2 h and was then diluted with EtOAc (40 mL) and washed with 5%  $\text{NaHCO}_3$  ( $3 \times 30\text{ mL}$ ), 5% sodium metabisulfite ( $3 \times 30\text{ mL}$ ) and brine ( $2 \times 30\text{ mL}$ ), dried ( $\text{MgSO}_4$ ), and concentrated *in vacuo*. Purification by flash column chromatography (1:19 EtOAc-petroleum. ether) gave pyran products **5** and **6**.

### General procedure for the $\text{Yb}(\text{OTf})_3$ promoted Maitland-Japp reaction

To a suspension of ytterbium (III) triflate (620 mg, 1.00 mmol) in  $\text{CH}_2\text{Cl}_2$  (10 mL) at  $-78\text{ }^\circ\text{C}$  was added aldehyde (1 mmol) followed by Chan's diene (570  $\mu\text{L}$ , 2.00 mmol). The white mixture was

stirred at  $-78\text{ }^{\circ}\text{C}$  for 40 min and then trifluoroacetic acid (308  $\mu\text{L}$ , 4 mmol) was added followed by the second aldehyde (1.2 mmol). The mixture was warmed to room temperature over 5 min and then stirred at room temperature for 2 h. The mixture was then diluted with EtOAc (40 mL) and washed with 5%  $\text{NaHCO}_3$  ( $3 \times 30\text{ mL}$ ) and brine ( $2 \times 30\text{ mL}$ ), dried ( $\text{MgSO}_4$ ), and concentrated *in vacuo*. Purification by flash column chromatography (1:19 EtOAc-petroleum. ether) gave pyran products 5 and 6, which were spectroscopically identical to those made *via* the  $\text{TiCl}_4$  method.

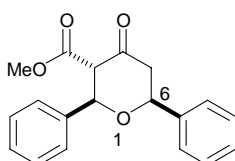

**5b.** white solid mp.  $133\text{-}135\text{ }^{\circ}\text{C}$ ;  $\nu_{\text{max}}$  (film)/ $\text{cm}^{-1}$ : 2953, 2921, 1747, 1717, 1496, 1455, 1274, 1067, 757, 699;  $^1\text{H}$  NMR (400 MHz;  $\text{CDCl}_3$ )  $\delta$  7.50-7.30 (10H, m, Ph), 5.13 (1H, d,  $J = 10.6\text{ Hz}$ , H-2), 4.95 (1H, dd,  $J = 11.3, 3.0\text{ Hz}$ , H-6), 3.77 (1H, dd,  $J = 10.6, 0.8\text{ Hz}$ , H-3), 3.70 (3H, s, OMe), 2.86 (1H, dd,  $J = 14.3, 3.0\text{ Hz}$ , H-5), 2.79 (1H, ddd,  $J = 14.3, 11.2, 0.8\text{ Hz}$ , H-5) ppm;  $^{13}\text{C}$  NMR (67.8 MHz;  $\text{CDCl}_3$ )  $\delta$  201.1 (s), 167.8 (s), 139.9 (s), 138.6 (s), 128.8 (d), 128.8 (d), 128.6 (d), 128.1 (d), 126.8 (d), 125.6 (d), 81.0 (d), 78.9 (d), 64.6 (d), 52.1 (q), 48.9 (t) ppm;  $m/z$  ( $\text{CI}^+$ ) 310 (62 %,  $\text{M}^+$ ), 293 (100 %,  $\text{M}^+\text{-OH}$ ); HRMS: found ( $\text{M}^+$ ), 310.1195.  $\text{C}_{19}\text{H}_{18}\text{O}_4$  requires ( $\text{M}^+$ ) 310.1205; Anal. Calcd. for  $\text{C}_{19}\text{H}_{18}\text{O}_4$ : C, 73.53; H, 5.85. Found C, 73.22; H 5.95 %.

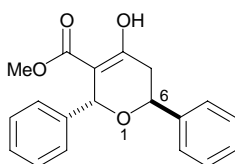

**6b.** white solid mp:  $118\text{-}120\text{ }^{\circ}\text{C}$ ;  $\nu_{\text{max}}$  (film)/ $\text{cm}^{-1}$  2955, 2918, 2849, 1745, 1662, 1443, 1269, 1219, 1063, 698;  $^1\text{H}$  NMR (400 MHz;  $\text{CDCl}_3$ )  $\delta$  12.38 (1H, s, OH), 7.57-7.28 (10H, m, Ph), 5.80 (1H, d,  $J = 1.0\text{ Hz}$ , H2), 4.59 (1H, dd,  $J = 10.8, 3.9\text{ Hz}$ , H-6), 3.67 (3H, s, OMe), 2.73 (1H, ddd,  $J = 18.1, 10.8, 1.0\text{ Hz}$ , H-5), 2.60 (1H, dd,  $J = 18.1, 3.9\text{ Hz}$ , H-5) ppm;  $^{13}\text{C}$  NMR (67.8 MHz;  $\text{CDCl}_3$ )  $\delta$

171.2, 165.8, 141.0, 140.8, 128.8, 128.4, 128.0, 127.9, 126.9, 126.0, 98.7, 73.7, 68.3, 52.2, 35.6, 29.8 ppm; m/z (CI<sup>+</sup>) 310 (50 %, M<sup>+</sup>), 279 (10 %, M<sup>+</sup>-OMe), 233 (77 %, M<sup>+</sup>-Ph); HRMS: found (M<sup>+</sup>), 310.1205. C<sub>19</sub>H<sub>18</sub>O<sub>4</sub> requires (M<sup>+</sup>), 310.1205; Anal. Calcd. for C<sub>19</sub>H<sub>18</sub>O<sub>4</sub>: C, 73.53; H, 5.85. Found C, 73.32; H 5.75 %.

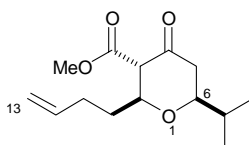

**5c.** oil  $\nu_{\max}$  (film) 2961, 2876, 1747, 1660, 1344, 1268, 1222, 1130, 1038, 913 cm<sup>-1</sup>; <sup>1</sup>H NMR (400 MHz; CDCl<sub>3</sub>)  $\delta$  5.75 (1H, dddd,  $J = 17.1, 10.3, 7.3, 6.4$  Hz, H-12), 4.98 (1H, ddt,  $J = 17.1, 3.4, 2.0$  Hz, H-13<sub>trans</sub>), 4.93 (1H, ddt,  $J = 10.3, 3.4, 1.5$  Hz, H-13<sub>cis</sub>), 3.80 (1H, ddd,  $J = 10.8, 9.3, 2.9$  Hz, H-2), 3.70 (3H, s, OMe), 3.28 (1H, ddd,  $J = 11.7, 6.8, 2.0$  Hz, H-6), 3.19 (1H, dd,  $J = 10.8, 1.0$  Hz, H-3), 2.45 (1H, dd,  $J = 14.2, 2.0$  Hz, H-5<sub>eq</sub>), 2.23 (1H, ddd,  $J = 14.2, 11.7, 1.0$  Hz, H-5<sub>ax</sub>), 2.22 (2H, m, H-10), 1.76 (1H, octet,  $J = 6.8$  Hz, H-7), 1.62 (2H, m, H-11), 0.99 (3H, d,  $J = 6.8$  Hz, H-8 or H-9), 0.90 (3H, d,  $J = 6.8$  Hz, H-8 or H-9) ppm; <sup>13</sup>C NMR (67.8 MHz; CDCl<sub>3</sub>) 202.7, 168.6, 137.6, 115.1, 81.7, 77.4, 63.1, 52.0, 44.6, 34.1, 33.4, 29.5, 18.2, 18.1 ppm; ; m/z (ES<sup>+</sup>) 318 (68 %, M<sup>+</sup>+Na+CH<sub>3</sub>CN), 277 (100 %, M<sup>+</sup>+Na), 171 (98 %, M<sup>+</sup>+H-CH<sub>2</sub>=CH(CH<sub>2</sub>)<sub>2</sub>CHO); HRMS: found (M<sup>+</sup>+Na), 277.1425. C<sub>14</sub>H<sub>22</sub>O<sub>4</sub> requires (M<sup>+</sup>+Na) 277.1416.

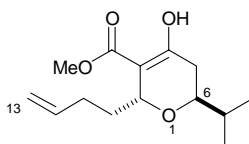

**6c.** oil  $\nu_{\max}$  (film) 2956, 1748, 1662, 1623, 1443, 1365, 1270, 1221, 1067, cm<sup>-1</sup>; <sup>1</sup>H NMR (400 MHz; CDCl<sub>3</sub>)  $\delta$  12.04 (1H, s, OH), 5.85 (1H, ddt,  $J = 17.2, 10.3, 6.8$  Hz, H-12), 5.07 (1H, ddt,  $J = 17.2, 1.5, 1.5$  Hz, H-13<sub>cis</sub>), 4.97 (1H, ddt,  $J = 10.3, 1.5, 1.5$  Hz, H-13<sub>trans</sub>), 4.46 (1H, d,  $J = 6.8$  Hz, H-2), 3.75 (3H, s, OMe), 3.46 (1H, ddd,  $J = 12.7, 7.3, 5.4$  Hz, H-6), 2.22 (4H, m, H-5 + H-10), 1.69 (3H, m, H-7 + H-11), 1.00 (3H, d,  $J = 6.8$  Hz, H-8 or H-9), 0.92 (3H, d,  $J = 6.8$  Hz, H-8 or H-9)

9) ppm;  $^{13}\text{C}$  NMR (67.8 MHz;  $\text{CDCl}_3$ )  $\delta$  (67.8 MHz;  $\text{CDCl}_3$ ) 171.0 (s), 170.1 (s), 138.3 (d), 114.5 (t), 101.1 (s), 70.9 (d), 70.5 (d), 51.4 (q), 33.1 (d), 32.1 (t), 31.8 (t), 30.2 (t), 18.7 (q), 18.2 (q) ppm;  $m/z$  (ES+) 318 (48 %,  $\text{M}^+\text{+Na+CH}_3\text{CN}$ ), 277 (100 %,  $\text{M}^+\text{+Na}$ ), 255 (12 %,  $\text{M}^+\text{+H}$ ), 171 (98 %,  $\text{M}^+\text{+H-CH}_2\text{=CH(CH}_2)_2\text{CHO}$ ); HRMS: found ( $\text{M}^+\text{+Na+CH}_3\text{CN}$ ), 318.1681.  $\text{C}_{14}\text{H}_{22}\text{O}_4$  requires ( $\text{M}^+\text{+Na+CH}_3\text{CN}$ ) 318.1674.

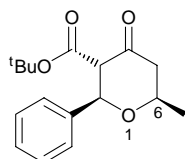

**8i.** white solid mp. 88-90 °C;  $[\alpha]_D$  ( $\text{CHCl}_3$ ,  $c = 1$ ) + 4.5;  $\nu_{\text{max}}$  (film) 2978, 2932, 1740, 1714, 1369, 1288, 1127,  $\text{cm}^{-1}$ ;  $^1\text{H}$  NMR (500 MHz;  $\text{CDCl}_3$ )  $\delta$  7.43-7.27 (5H, m, Ph), 4.84 (1H, d,  $J = 10.8$  Hz, H-2), 4.00 (1H, ddq,  $J = 10.8, 5.9, 2.9$  Hz, H-6), 3.47 (1H, dd,  $J = 10.8, 1.0$  Hz, H-3), 2.53 (1H, dd,  $J = 14.6, 2.9$  Hz, H-5 $_{eq}$ ), 2.40 (1H, ddd,  $J = 14.6, 10.8, 1.0$  Hz, H-5 $_{ax}$ ), 1.29 (9H, s,  $^t\text{Bu}$ ), 1.38 (3H, d,  $J = 5.9$  Hz, H-7) ppm;  $^{13}\text{C}$  NMR (125 MHz;  $\text{CDCl}_3$ )  $\delta$  202.3 (s), 166.6 (s), 138.7 (s), 128.7 (d), 128.6 (d), 127.2 (d), 82.0 (s), 81.1 (d), 73.8 (d), 64.9 (d), 48.7 (t), 27.9 (q), 22.2 (q) ppm;  $m/z$  (ES+) 354 (100 %,  $\text{M}^+\text{+Na+CH}_3\text{CN}$ ), 313 (82 %,  $\text{M}^+\text{+Na}$ ); HRMS: found ( $\text{M}^+\text{+Na}$ ), 313.1428.  $\text{C}_{17}\text{H}_{22}\text{O}_4$  requires ( $\text{M}^+\text{+Na}$ ) 313.1416.

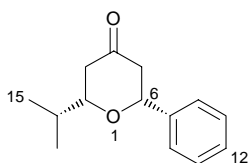

**9b.** white solid mp.  $[\alpha]_D$  ( $\text{CHCl}_3$ ,  $c = 1$ ) - 46.8;  $\nu_{\text{max}}$  (film) 3031, 2963, 1717, 1347, 1252, 1153, 1065 5.72,  $\text{cm}^{-1}$ ;  $^1\text{H}$  NMR (400 MHz;  $\text{CDCl}_3$ )  $\delta$  7.31-7.16 (5H, m, Ph), 4.51 (1H, dd,  $J = 11.5, 2.6$  Hz, H-6), 3.39 (1H, ddd,  $J = 11.5, 6.0, 2.6$  Hz, H-2), 2.53 (1H, ddd,  $J = 14.5, 2.6, 2.1$  Hz, H-5 $_{eq}$ ), 2.40 (1H, dd,  $J = 14.5, 11.5$  Hz, H-5 $_{ax}$ ), 2.35 (1H, ddd,  $J = 14.1, 2.6, 2.1$  Hz, H-2 $_{eq}$ ), 2.28 (1H, dd,  $J = 14.1, 11.5$  Hz, H-2 $_{ax}$ ), 1.81 (1H, octet,  $J = 6.8$  Hz, H-13), 0.92 (3H, d,  $J = 6.8$  Hz, H-14 or H-15), 0.88 (3H, d,  $J = 6.8$  Hz, H-14 or H-15) ppm;  $^{13}\text{C}$  NMR (100 MHz;  $\text{CDCl}_3$ )  $\delta$  207.6 (s), 141.1

(s), 128.5 (d), 127.8 (d), 125.4 (d), 81.9 (d), 78.2 (t), 49.7 (t), 44.6 (t), 33.2 (d), 18.2 (q), 17.9 (q) ppm; m/z (CI+) 218 (59 %, M<sup>+</sup>), 175 (16 %, M<sup>+</sup>-C<sub>3</sub>H<sub>7</sub>), 77 (31 %, Ph); HRMS: found (M<sup>+</sup>), 218.1307. C<sub>14</sub>H<sub>18</sub>O<sub>2</sub> requires (M<sup>+</sup>) 218.1307.

### **Determination of the enantiomeric excess **8i** and **9b****

<sup>1</sup>H NMR shift reagent experiment: **8i** (1 mg) in CDCl<sub>3</sub> (0.45 ml) with 50 mol% (-) Eu(hfc)<sub>3</sub> at 500 MHz. <sup>1</sup>H NMR shift reagent experiment: **9b** (1 mg) in CDCl<sub>3</sub> (0.45 ml) with 15 mol% (-) Eu(hfc)<sub>3</sub> at 400 MHz. See following spectra.

## Notes on X-ray crystal data

Diffraction data were acquired on a Bruker SMART1000 (**5b**) or a Bruker SMART APEX (**6b**) CCD area detector diffractometer equipped with an Oxford Cryosystems open-flow cryostat operating at 150 K. The structures were solved by direct methods and refined by full-matrix least-squares on  $F^2$ .

Crystal data for **5b**.  $C_{19}H_{18}O_4$ ,  $M = 310.33$ , monoclinic,  $a = 13.0132(10)$ ,  $b = 8.6004(7)$ ,  $c = 14.1620(11)$  Å,  $\beta = 91.558(2)^\circ$ ,  $V = 1584.4(2)$  Å<sup>3</sup>,  $T = 150(2)$  K,  $Z = 4$ ,  $D_x = 1.301$  g cm<sup>-3</sup>. Final  $R_1$  [ $2746 F > 4\sigma(F)$ ] = 0.0375,  $wR_2$  [all 3656  $F^2$ ] = 0.105.

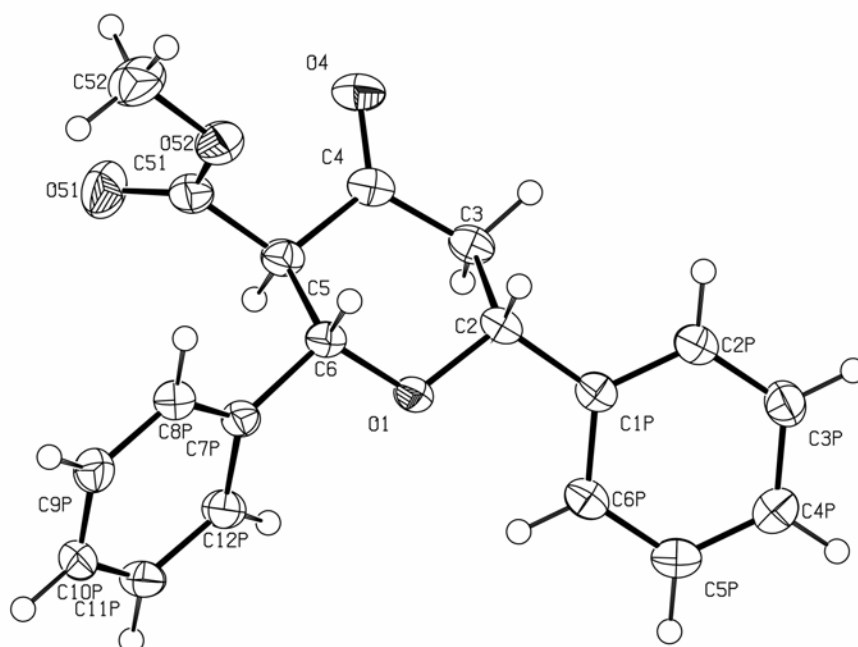

Crystal data for **6b**.  $C_{19}H_{18}O_4$ ,  $M = 310.33$ , triclinic,  $a = 5.5429(5)$ ,  $b = 9.5351(8)$ ,  $c = 15.1955(13)$  Å,  $\alpha = 82.937(2)$ ,  $\beta = 85.273(2)$ ,  $\gamma = 77.190(2)^\circ$ ,  $V = 775.9(2)$  Å<sup>3</sup>,  $T = 150(2)$  K,  $Z = 2$ ,  $D_x = 1.328$  g cm<sup>-3</sup>. Final  $R_1 [2913 F > 4\sigma(F)] = 0.0401$ ,  $wR_2 [\text{all } 3507 F^2] = 0.111$ .

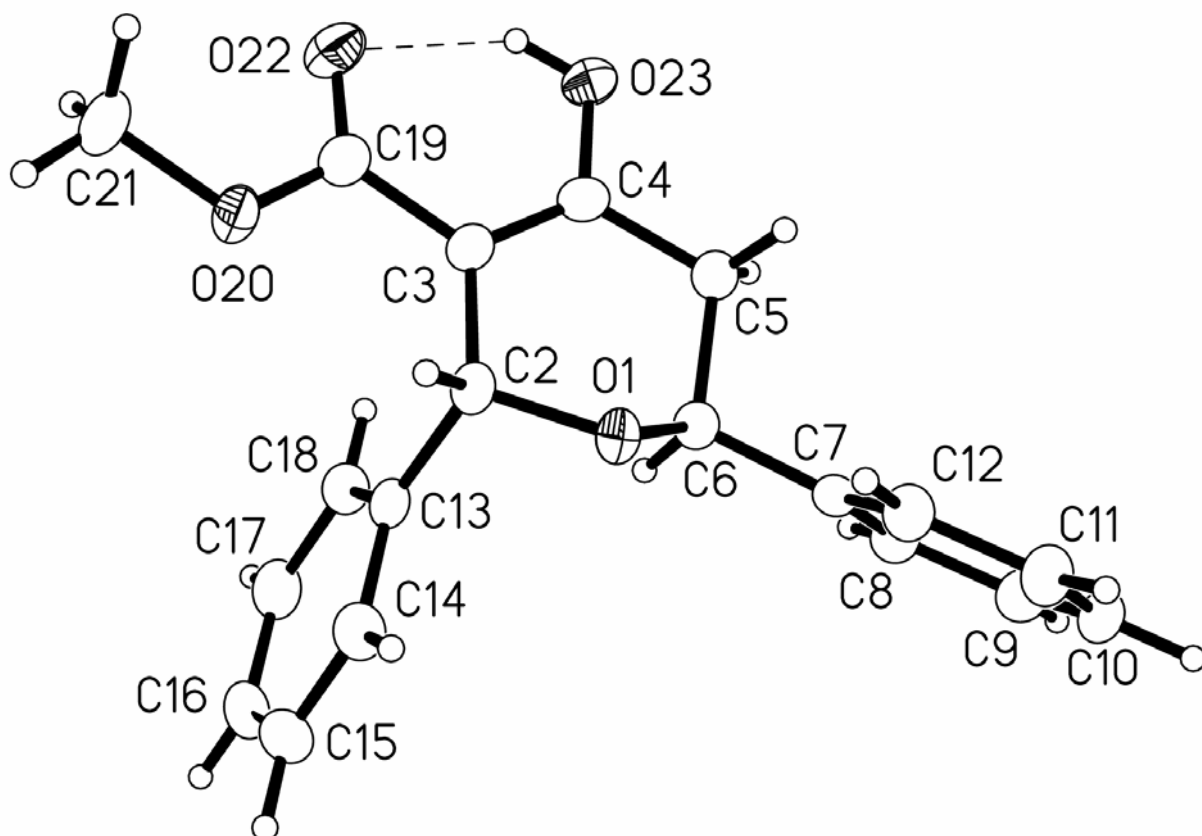

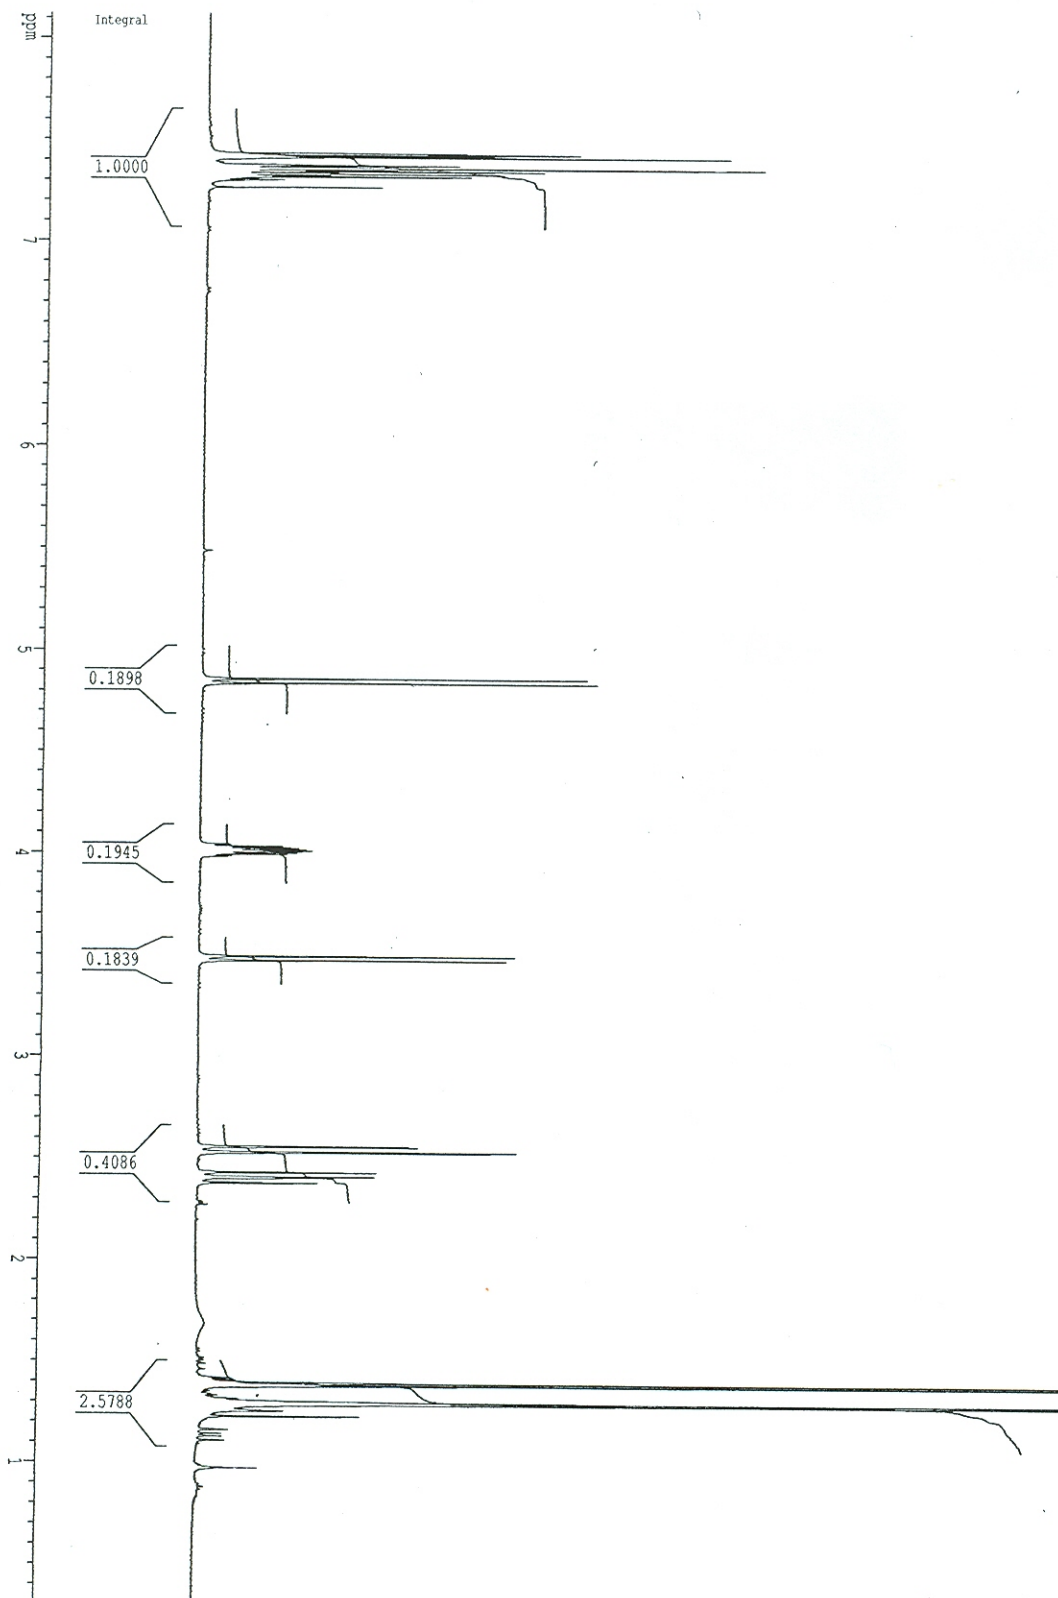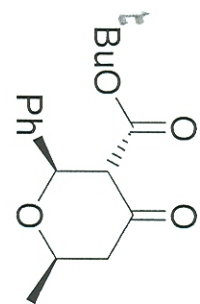



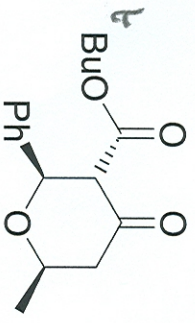

single enantiomer

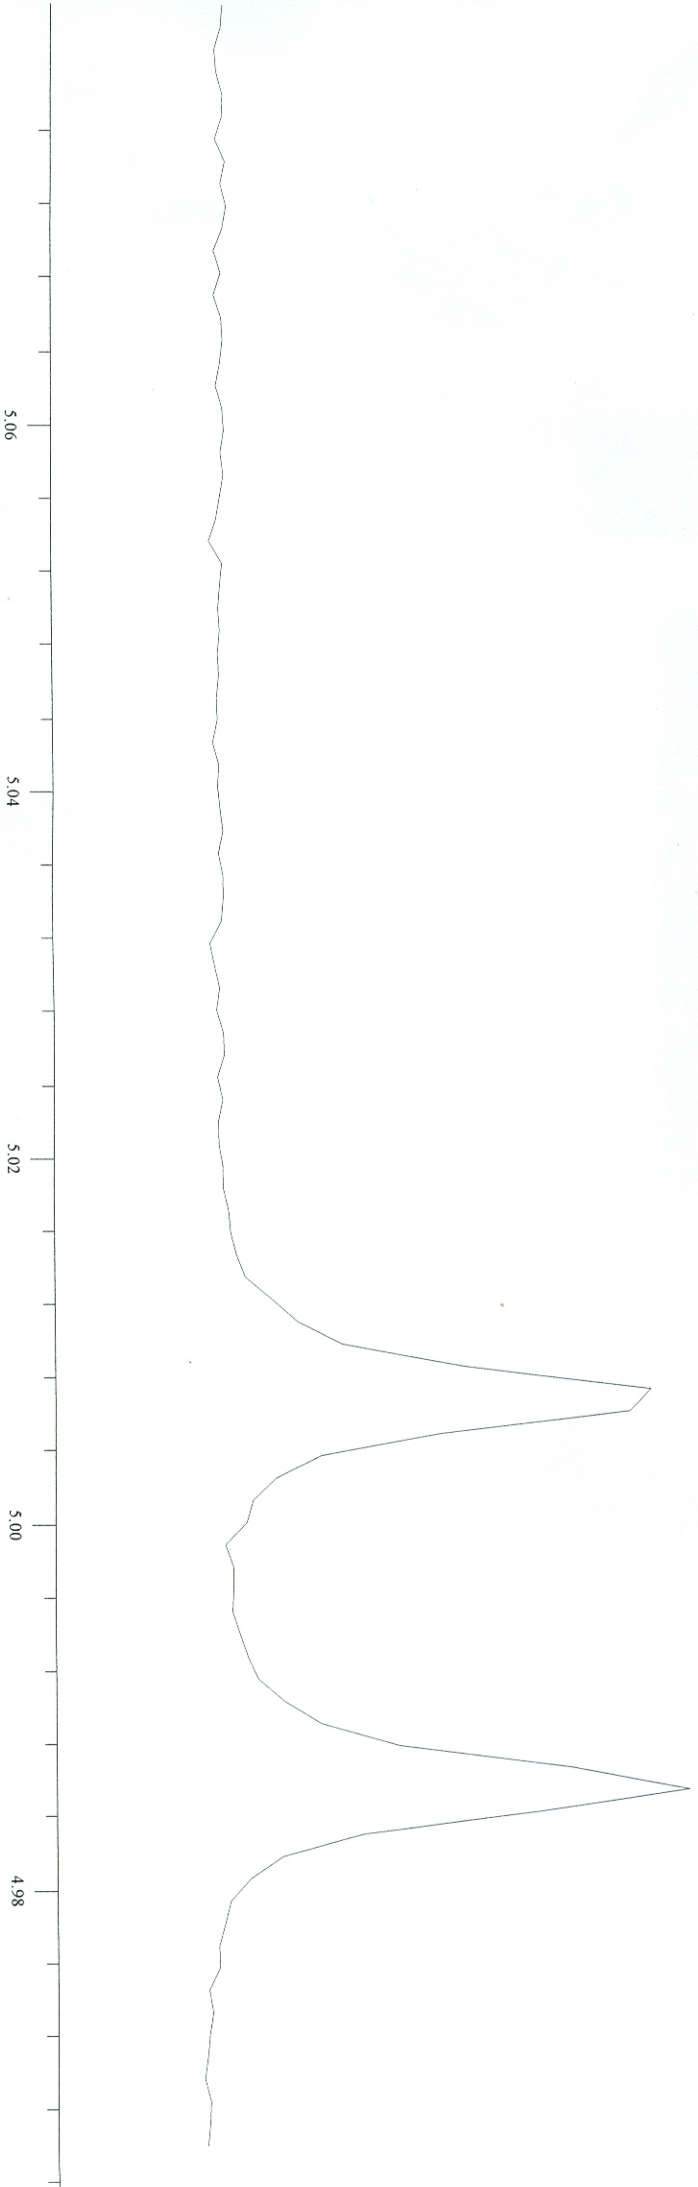



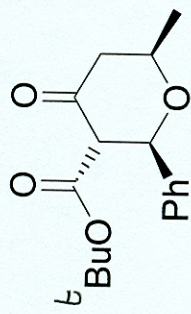

racemate

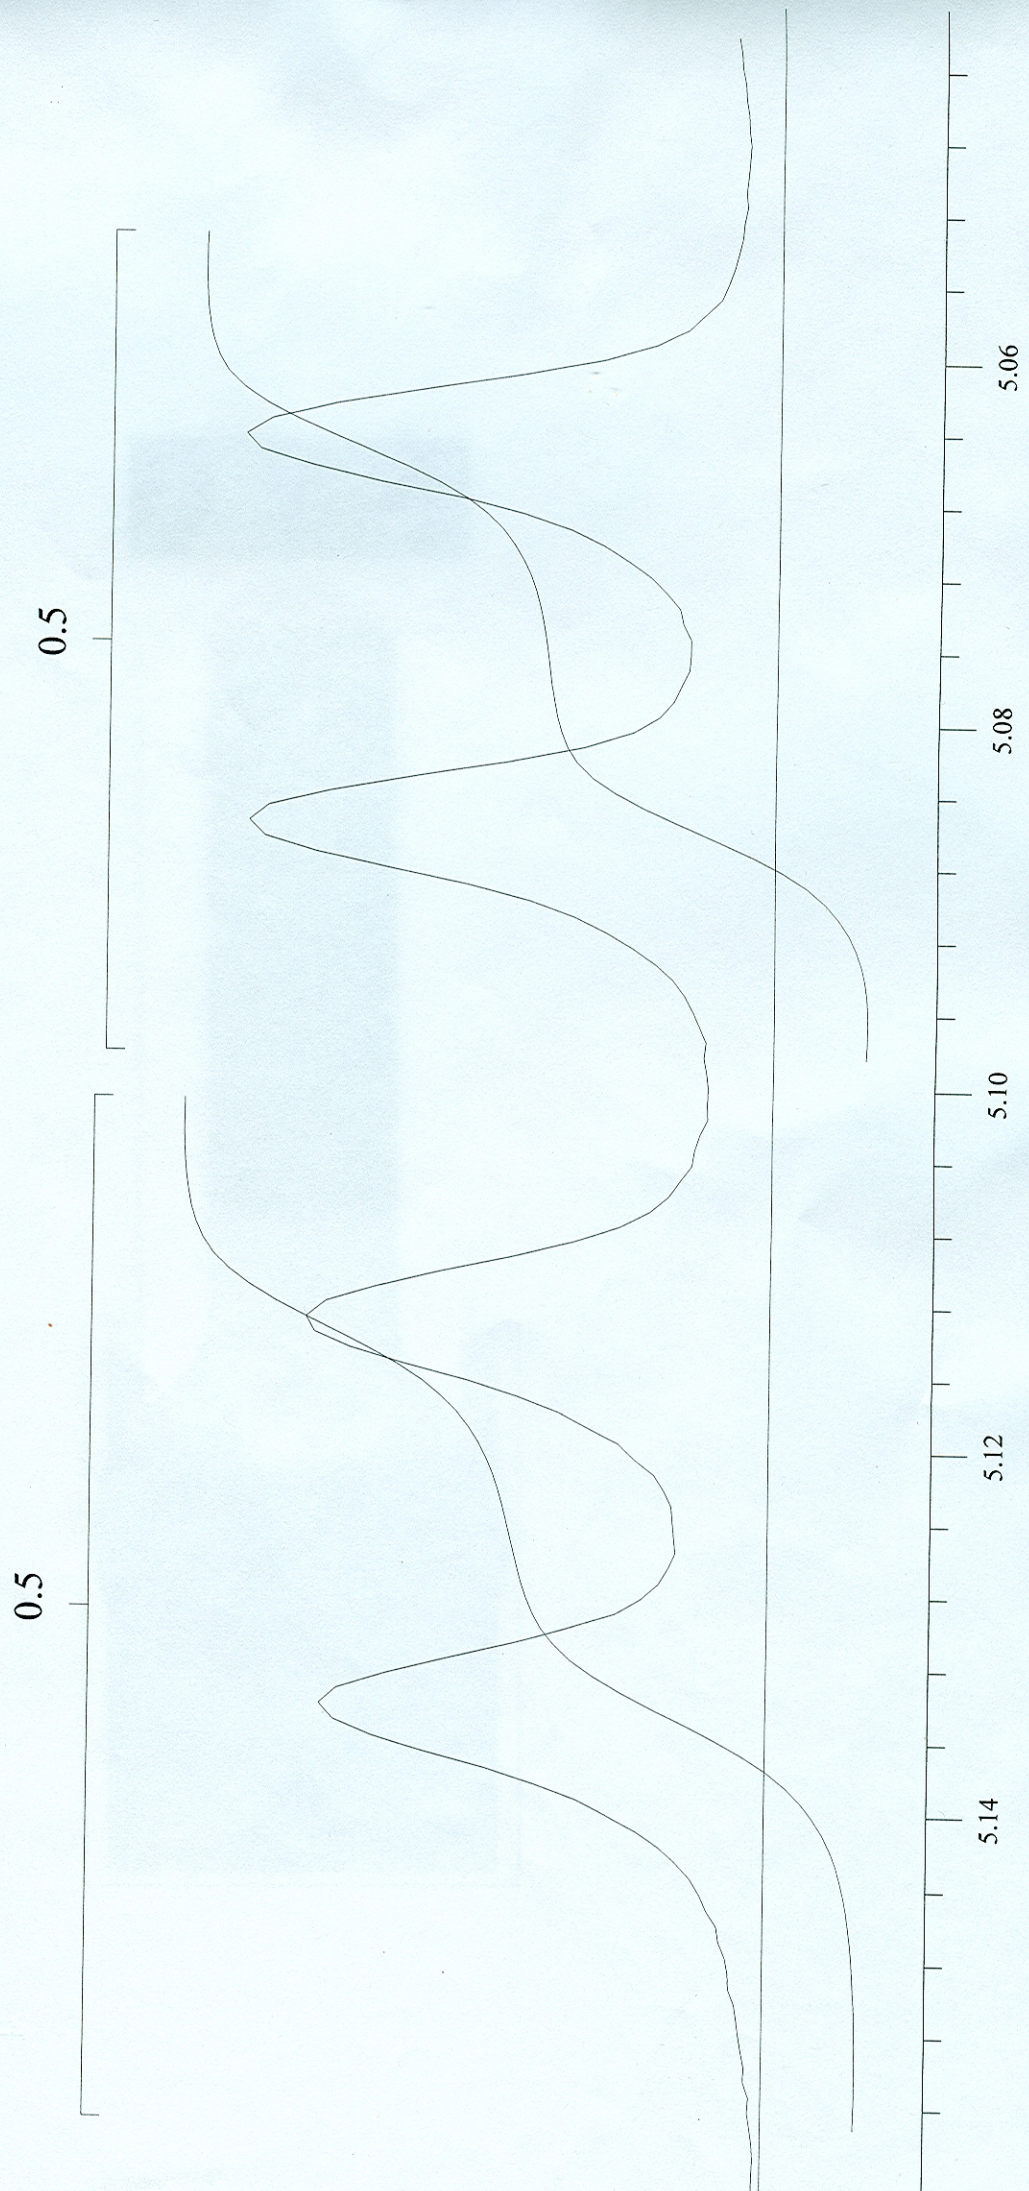



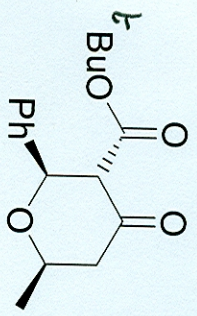

single enantiomer doped with racemate

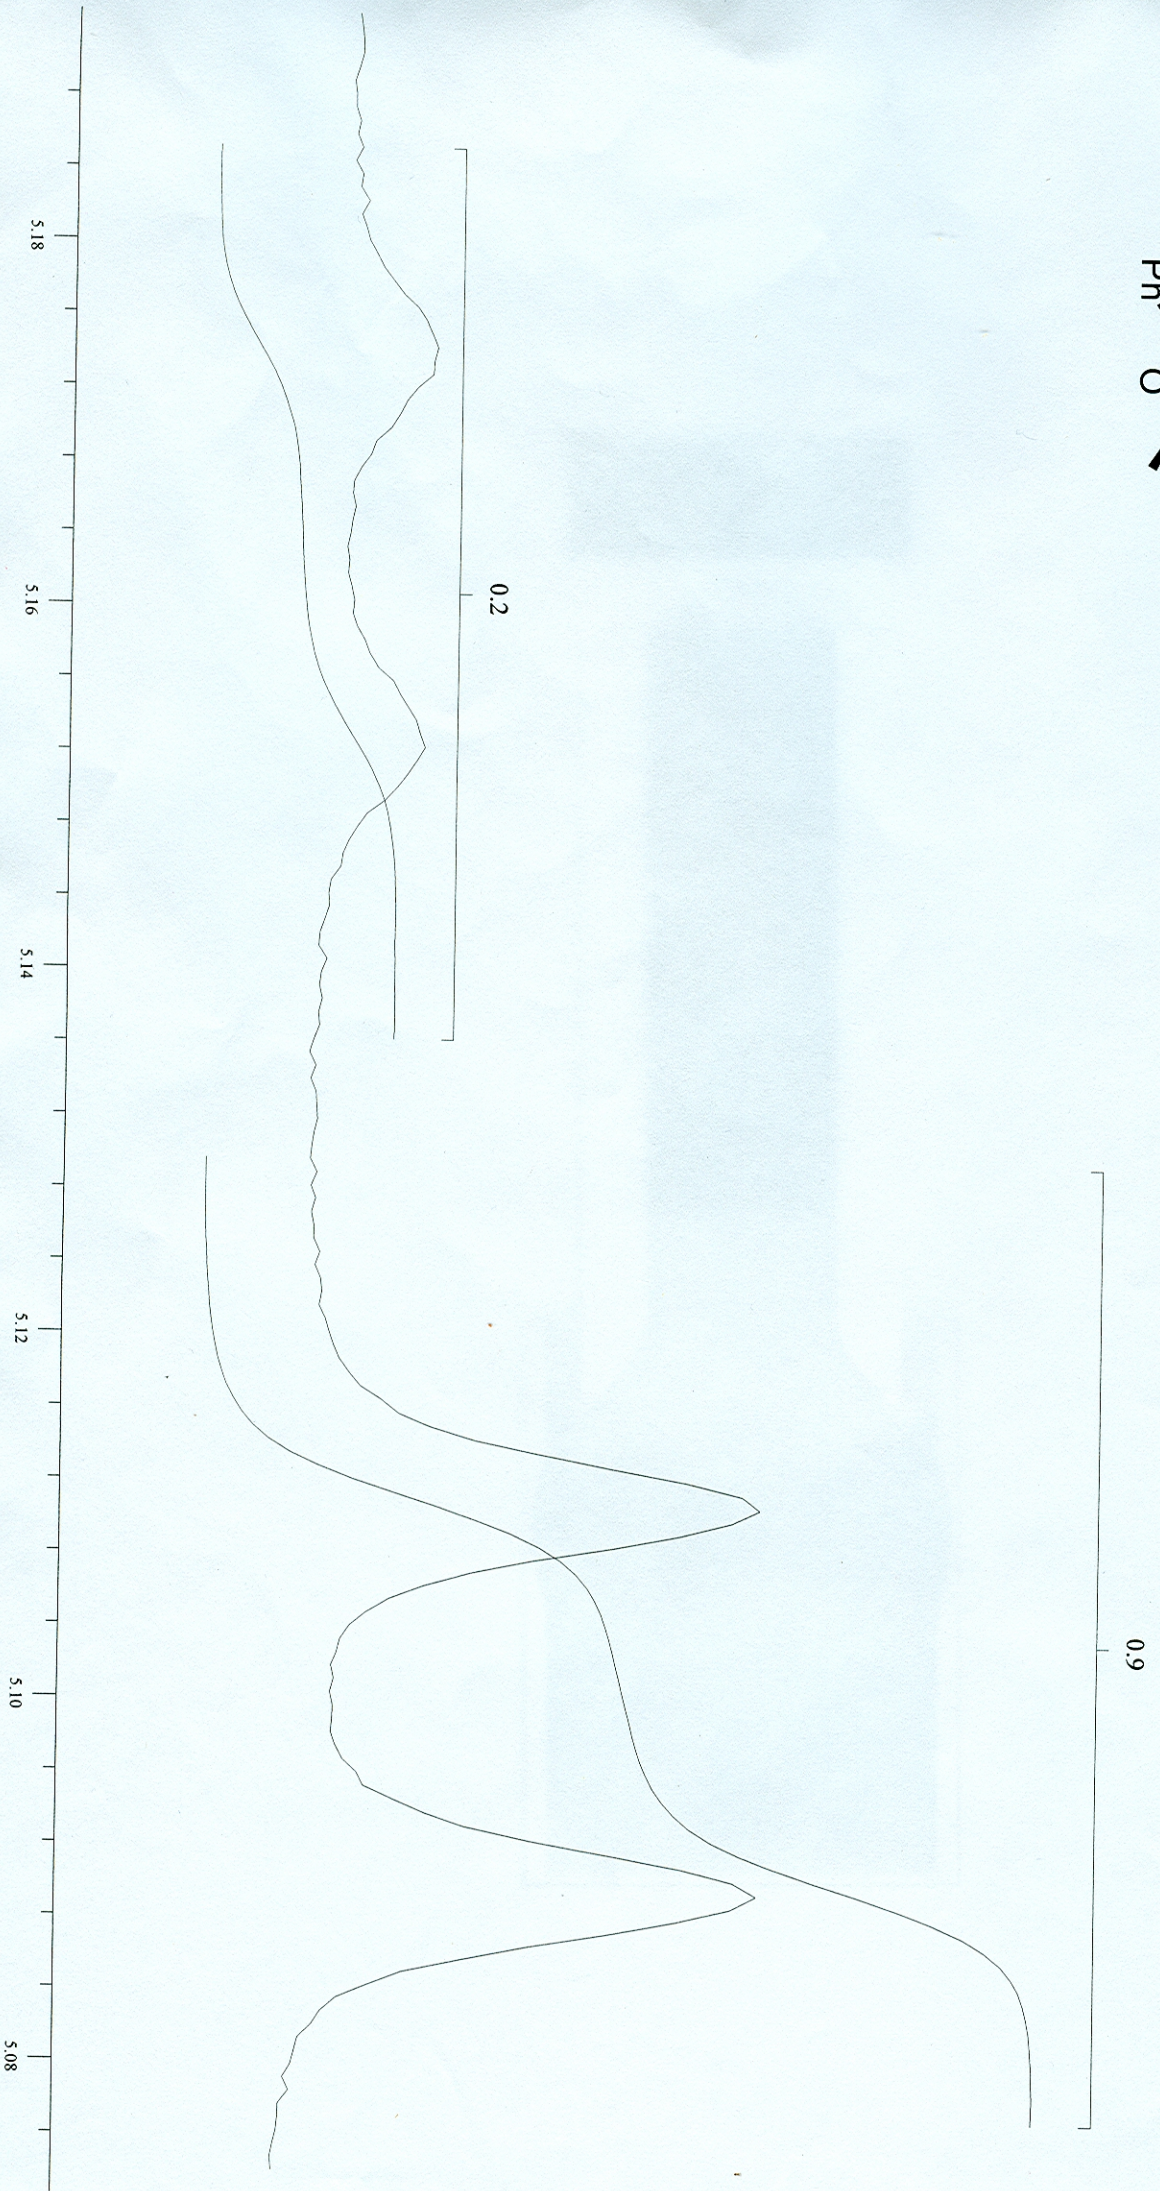



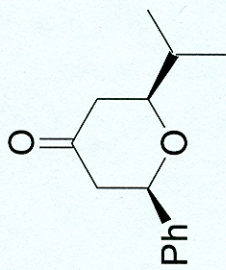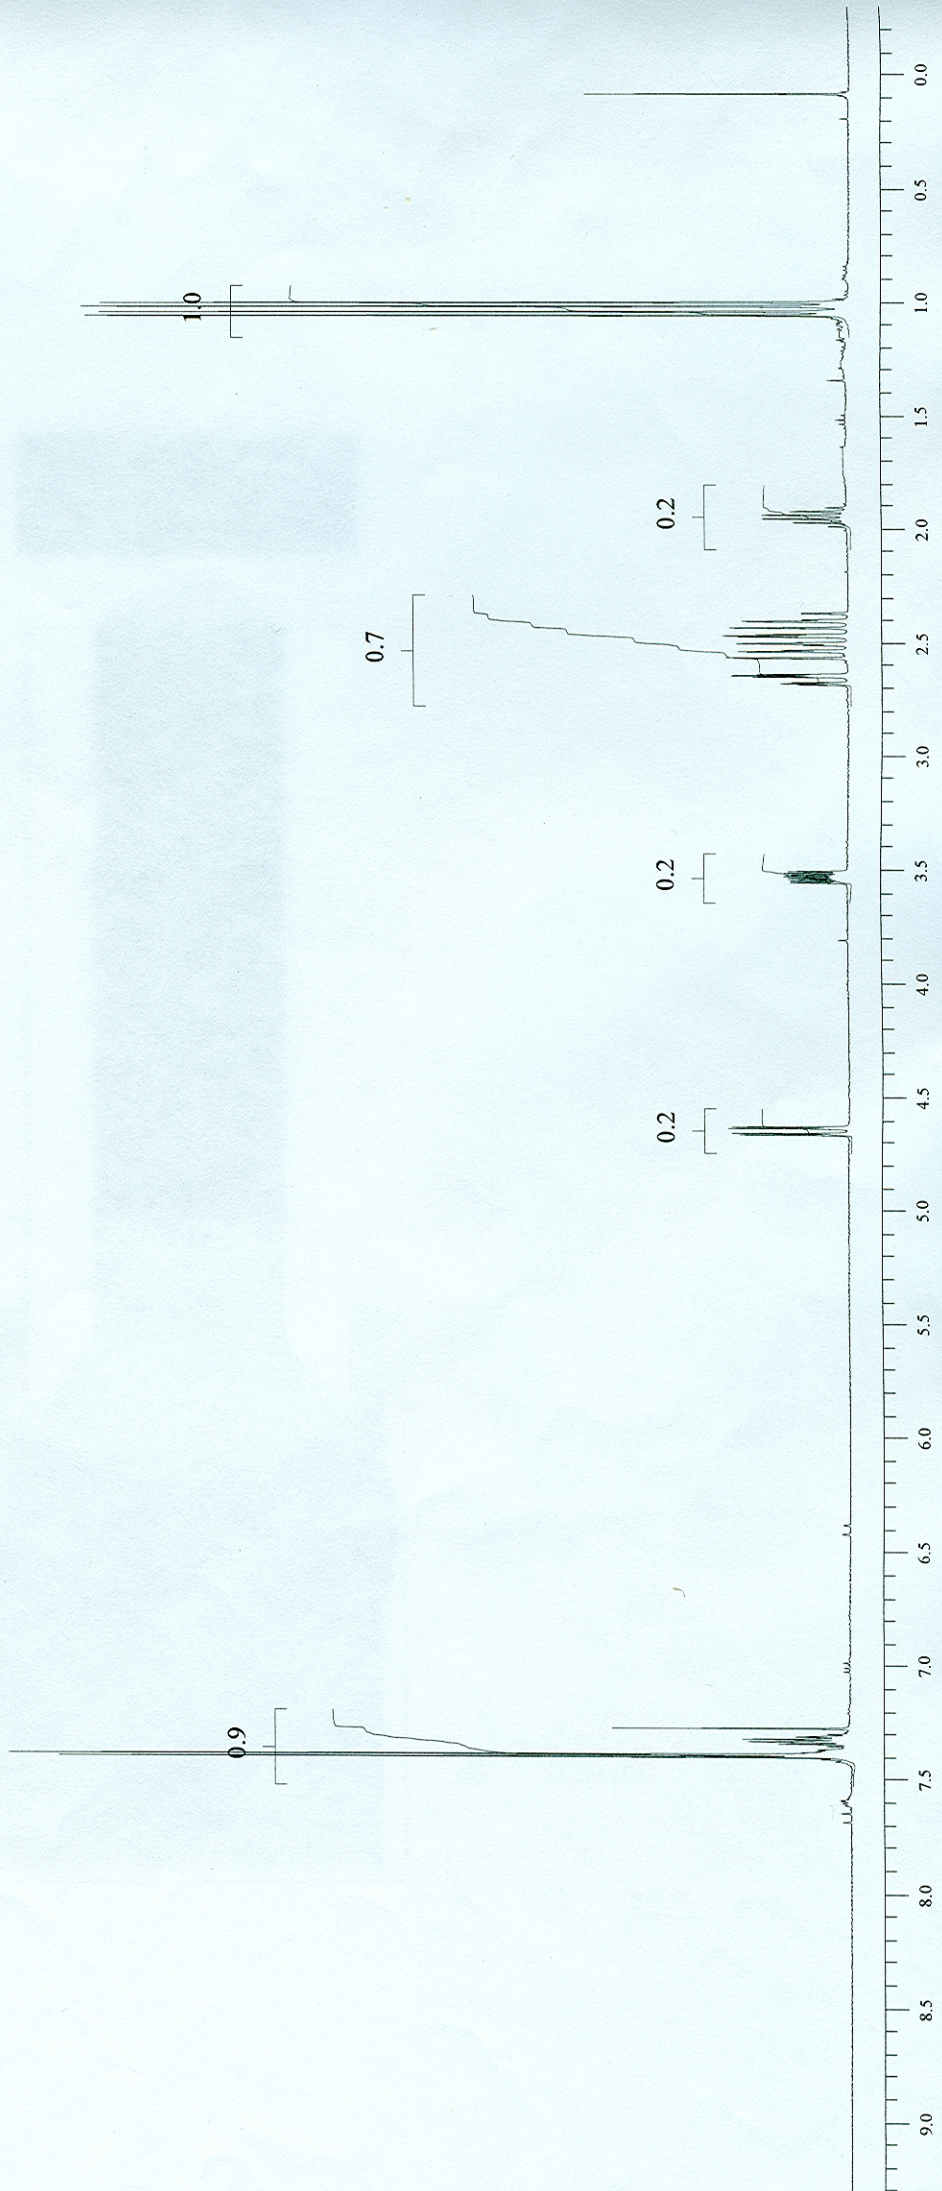



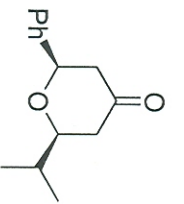

single enantiomer doped with racemate

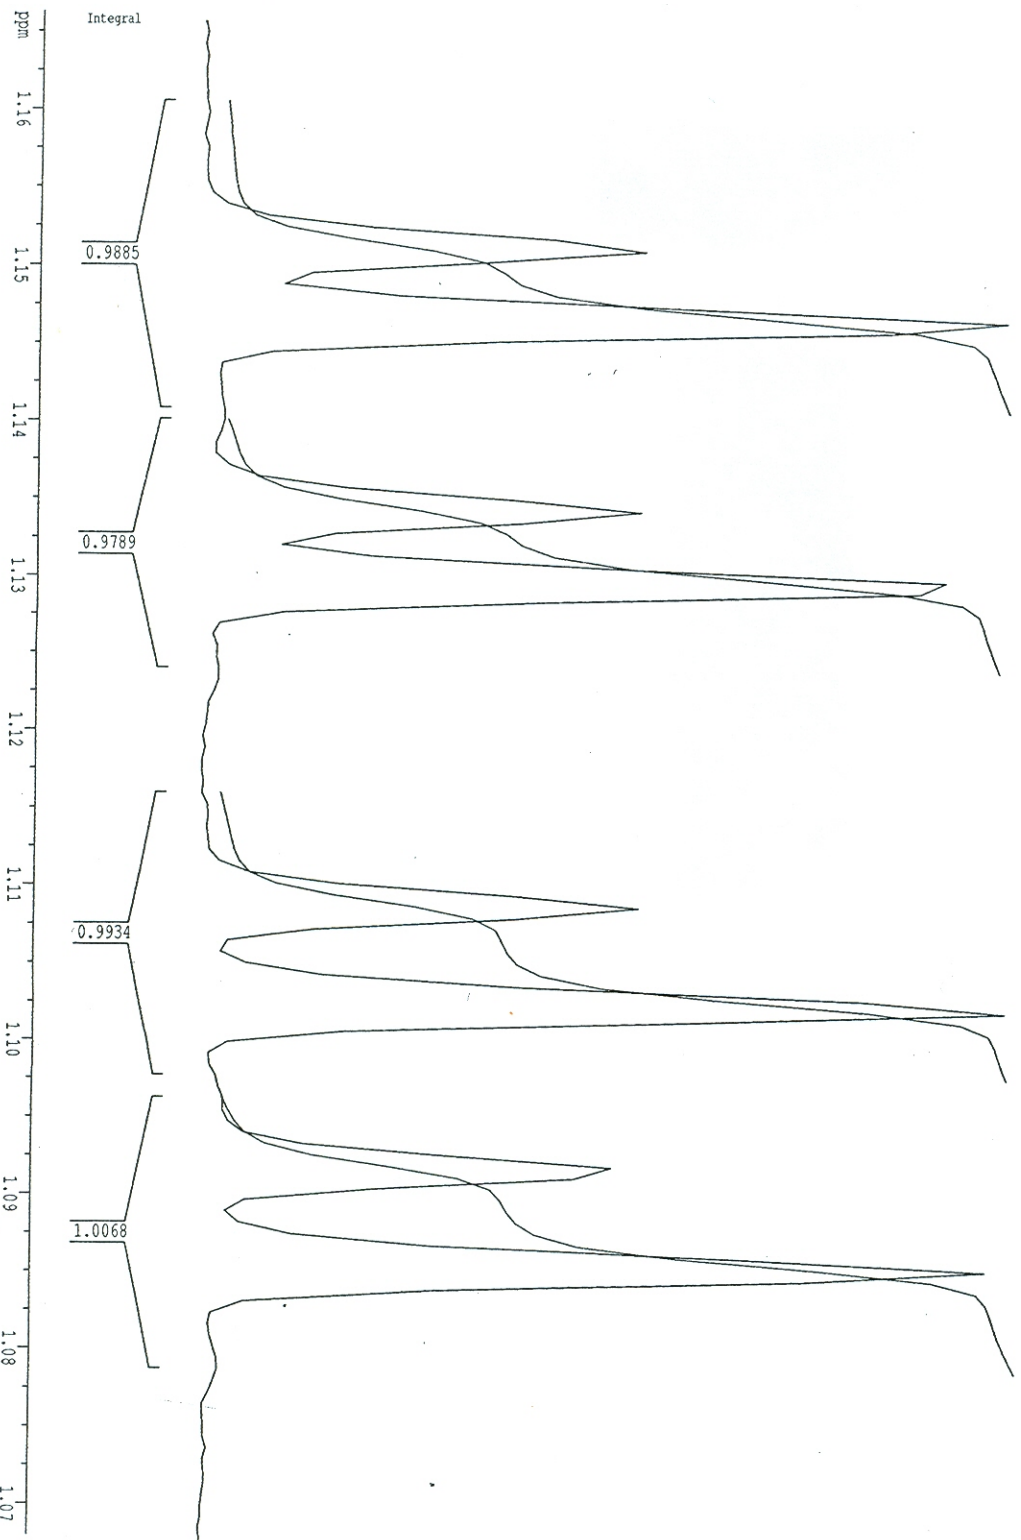

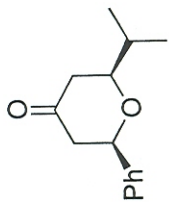

racemate

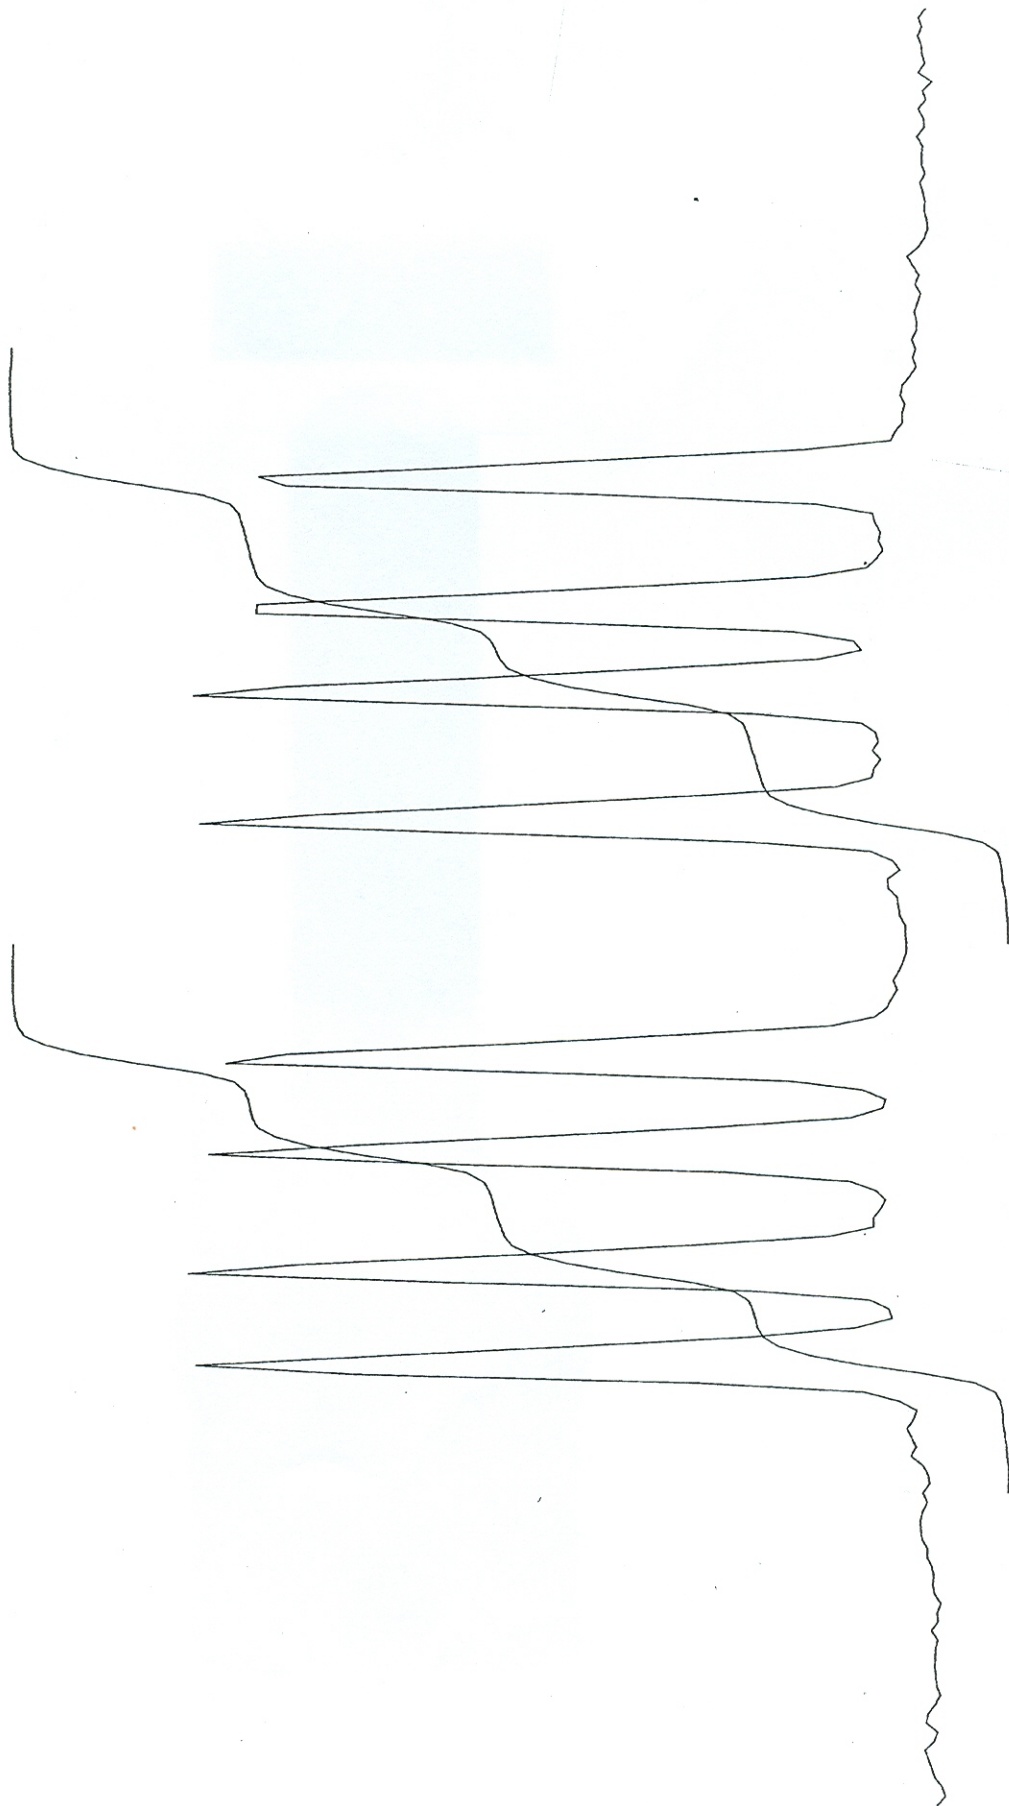

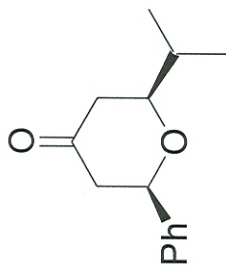

single enantiomer

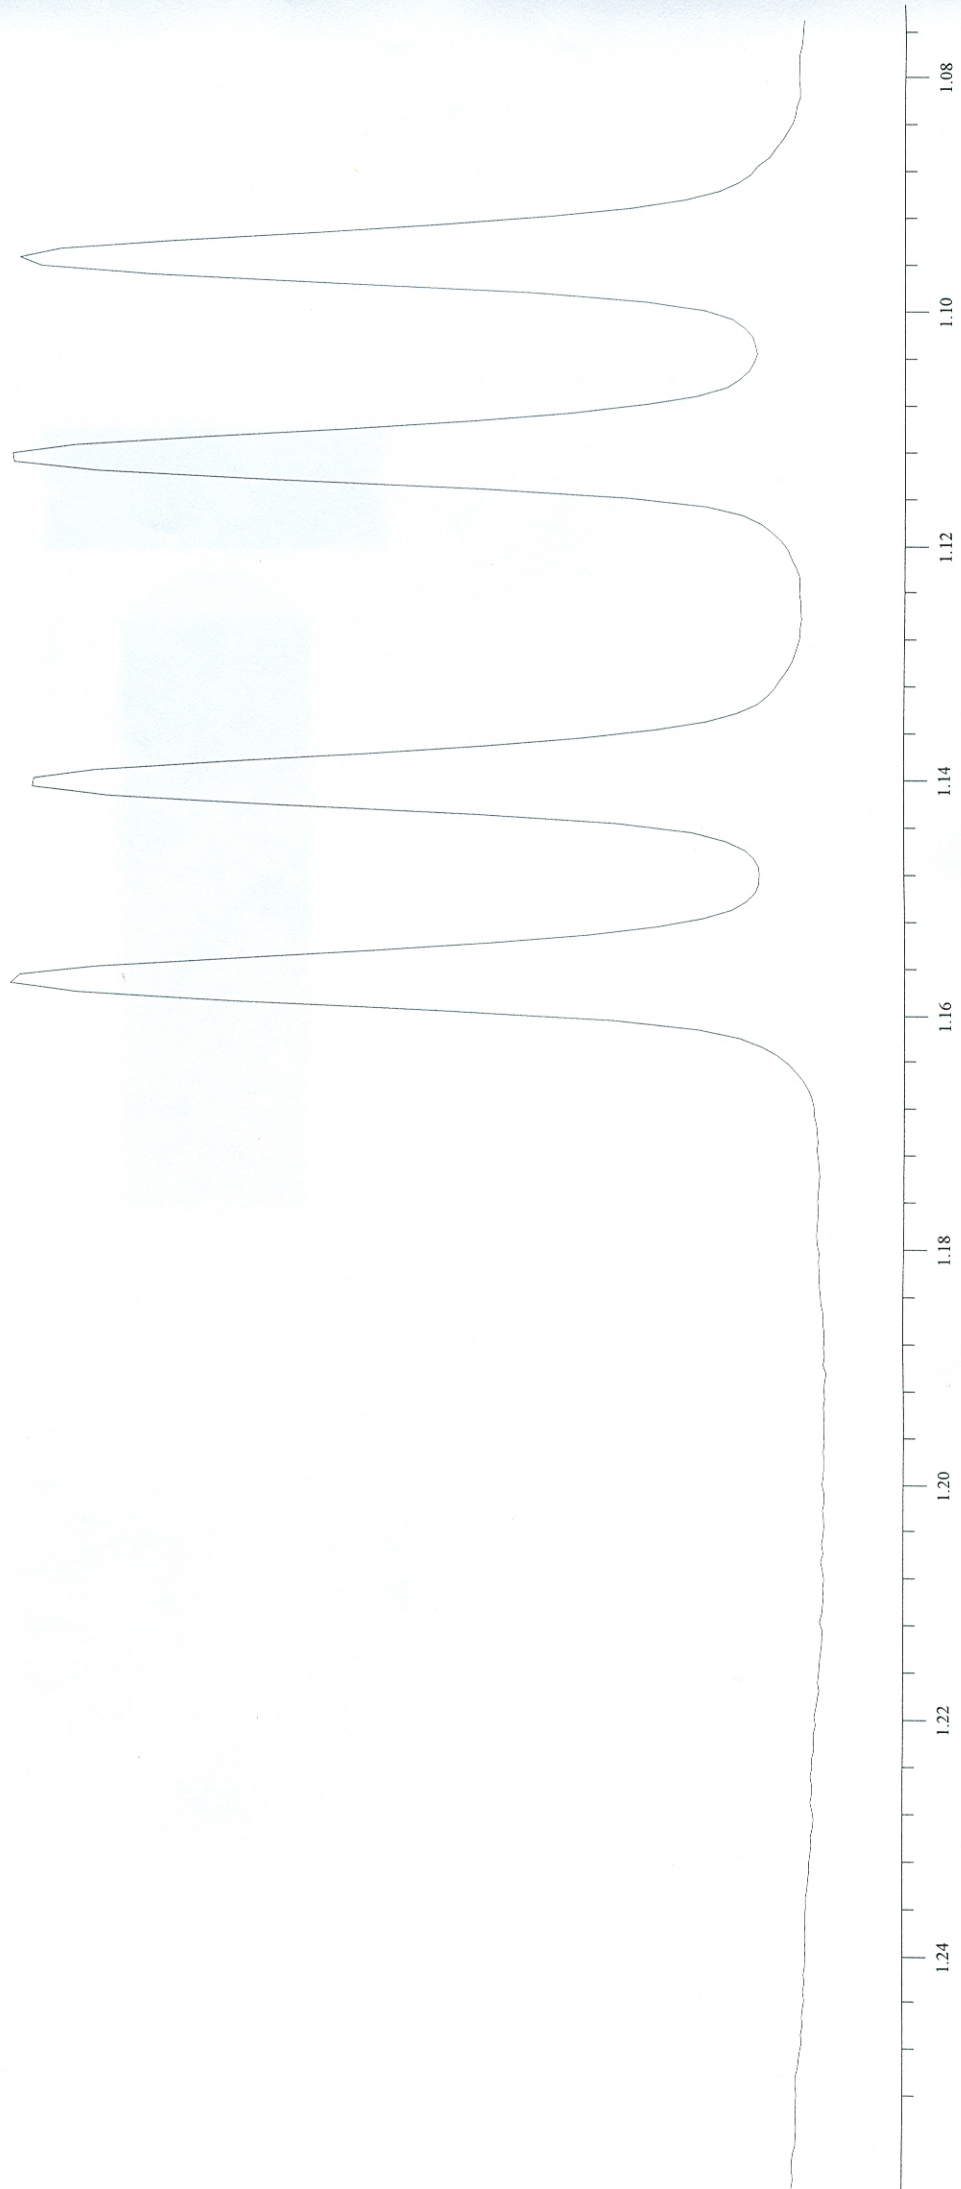

Supplement: b416247a.pdf [file b416247a.pdf]
